# Supplementary material
Source: PubMed Central journal article supplement (PMC2790827)
Supplement: NIHMS151775-supplement-Supp1.pdf [file NIHMS151775-supplement-Supp1.pdf]

## SUPPLEMENTAL MATERIAL

Supplemental Table 1. Summary of SNPs in the flanking region of CNV\_6q14.1.

| Marker     | Chr. | Position (bp)     | Allele | <i>EDN1</i> Expression Assoc. P | Distance to CNV_6q14.1 (bp) | LD with CNV_6q14.1 (R <sup>2</sup> ) |           |         |
|------------|------|-------------------|--------|---------------------------------|-----------------------------|--------------------------------------|-----------|---------|
|            |      |                   |        |                                 |                             | Asian                                | Caucasian | African |
| rs6911854  | 6    | 79001258          | C/T    | 0.015                           | 24514                       | 0.011                                | 0.002     | 0.058   |
| rs946138   | 6    | 79001613          | C/T    | 0.862                           | 24159                       | 0.010                                | 0.000     | 0.007   |
| rs17728780 | 6    | 79019012          | A/G    | 0.848                           | 6760                        | 0.000                                | 0.041     | 0.113   |
| rs16889799 | 6    | 79019300          | A/G    | 0.373                           | 6472                        | 0.016                                | 0.000     | 0.000   |
| rs7751252  | 6    | 79019345          | A/G    | 0.711                           | 6427                        | 0.000                                | 0.041     | 0.039   |
| CNV_6q14.1 | 6    | 79025772-79091892 |        | 1.15x10 <sup>-5</sup>           | 0                           | NA                                   | NA        | NA      |
| rs818316   | 6    | 79095953          | A/C    | 0.084                           | 4061                        | 0.179                                | 0.550     | 0.027   |
| rs9448374  | 6    | 79108333          | G/T    | 0.152                           | 16441                       | 0.000                                | 0.000     | 0.038   |
| rs818267   | 6    | 79108563          | A/T    | 0.045                           | 16671                       | 0.008                                | 0.744     | 0.037   |
| rs818269   | 6    | 79108671          | G/T    | 0.006                           | 16779                       | 0.008                                | 0.744     | 0.189   |
| rs235460   | 6    | 79109332          | A/G    | 0.177                           | 17440                       | 0.007                                | 0.261     | 0.008   |
| rs235459   | 6    | 79109564          | A/C    | 0.174                           | 17672                       | 0.008                                | 0.288     | 0.064   |
| rs16889893 | 6    | 79111910          | A/T    | 0.534                           | 20018                       | 0.004                                | 0.000     | 0.000   |
| rs766797   | 6    | 79116509          | C/T    | 0.534                           | 24617                       | 0.004                                | 0.000     | 0.000   |
